# Supplementary material for: Strontium pyrophosphate modified by phosphoric acid for the dehydration of lactic acid to acrylic acid
Source: Royal Society of Chemistry journal article supplement (doi:10.1039/c4ra03398a), 2014-07-03
Supplement: c4ra03398a1.pdf [file c4ra03398a1.pdf]

### Supplementary information

#### Strontium pyrophosphate modified by phosphoric acid for dehydration of lactic acid to acrylic acid

Congming Tang<sup>a\*</sup>, Jiansheng Peng<sup>a</sup>, Xinli Li<sup>a</sup>, Zhanjie Zhai<sup>a</sup>, Ning Jiang<sup>b</sup>, Wei Bai<sup>b</sup>, Hejun Gao<sup>a</sup>, and Yunwen Liao<sup>a</sup>

The stability of strontium pyrophosphate modified using phosphoric acid (0.1 wt%) was investigated and the results were given in Fig. S1. It is clearly seen that the catalyst retains an excellent stability during the initial reaction time of 4 hours. However, the selectivity of acrylic acid decreases drastically when the reaction time is above 4 hours. Compared with acrylic acid selectivity, the conversion of lactic acid decreases slightly.

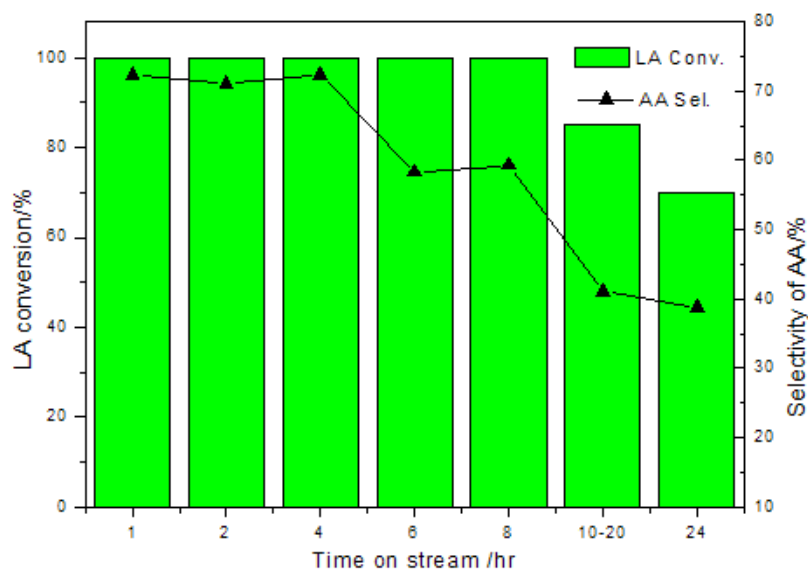

Fig. S1 the stability of the modified strontium pyrophosphate catalyst with time on stream
